# Supplementary material
Source: PubMed Central journal article supplement (PMC2144736)
Supplement: NIHMS35129-supplement-supplement.pdf [file NIHMS35129-supplement-supplement.pdf]

## *S. cerevisiae* (Sc) Sup35

1            124            254            685

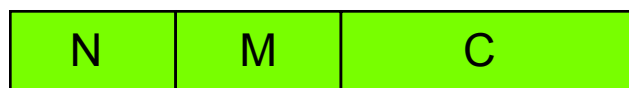

28.7% Q    18.5% K  
16.4% N    17.7% E  
17.2% G  
16.4% Y

### N Domain Sequence

```
M S D S N Q G N N Q Q N Y Q Q Y S Q
N G N Q Q Q G N N R Y Q G Y Q A Y N
A Q A Q P A G G Y Y Q N Y Q G Y S G
Y Q Q G G Y Q Q Y N P D A G Y Q Q Q
Y N P Q G G Y Q Q Y N P Q G G Y Q Q
Q F N P Q G G R G N Y K N F N Y N N
N L Q G Y Q A G F Q P Q S Q G
```

## *C. albicans* (Ca) Sup35

1            142            291            721

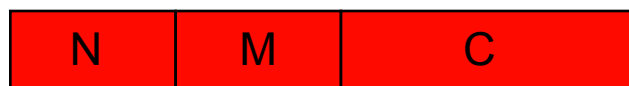

37.9% Q    16.0% K  
13.6% N    12.0% E  
13.6% G  
12.9% Y

### N Domain Sequence

```
M S D Q Q N T Q D Q L S G A M A N A
S L N G D Q S K Q Q Q Q Q Q Q Q Q
Q N Y Y N P N A A Q S F V P Q G G Y
Q Q F Q Q F Q P Q Q Q Q Q Q Y G G Y
N Q Y N Q Y Q G G Y Q Q N Y N N R G
G Y Q Q G Y N N R G G Y Q Q N Y N N
R G G Y Q G Y N Q N Q Q Y G G Y Q Q
Y N S Q P Q Q Q Q Q Q Q S Q G
```

## Sc/Ca Sup35 Chimera

1 40 49 141 124            254            685

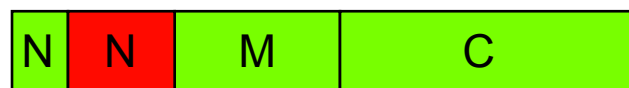

### N Domain Sequence

```
M S D S N Q G N N Q Q N Y Q Q Y S Q
N G N Q Q Q G N N R Y Q G Y Q A Y N
A Q A Q S F V P Q G G Y Q Q F Q Q F
Q P Q Q Q Q Q Q Y G G Y N Q Y N Q Y
Q G G Y Q Q N Y N N R G G Y Q Q G Y
N N R G G Y Q Q N Y N N R G G Y Q Q G
Y N Q N Q Q Y G G Y Q Q Y N S Q P Q
Q Q Q Q Q Q S Q G
```

The **purple serine** was changed to arginine for the chimera mutant S17R.

The **blue glycines** were changed to alanines for the chimera mutant G70, 71, 80, 81A.

**Supplementary Table S2.** ScNM 20mer peptides that were tested in this work. Peptides that bound full-length ScNM after 2 hours (1  $\mu$ M ScNM, 5% label) and 2.5 days (5  $\mu$ M ScNM, 75% label) of incubation are highlighted in bold and regular green text, respectively.

| Start residue | N-terminus                                     | C-terminus |
|---------------|------------------------------------------------|------------|
| 2             | S D S N Q G N N Q Q N Y Q Q Y S Q N G N        |            |
| 3             | <b>D S N Q G N N Q Q N Y Q Q Y S Q N G N Q</b> |            |
| 4             | S N Q G N N Q Q N Y Q Q Y S Q N G N Q Q        |            |
| 5             | N Q G N N Q Q N Y Q Q Y S Q N G N Q Q Q        |            |
| 6             | Q G N N Q Q N Y Q Q Y S Q N G N Q Q Q G        |            |
| 7             | G N N Q Q N Y Q Q Y S Q N G N Q Q Q G N        |            |
| 8             | N N Q Q N Y Q Q Y S Q N G N Q Q Q G N N        |            |
| 9             | <b>N Q Q N Y Q Q Y S Q N G N Q Q Q G N N R</b> |            |
| 10            | <b>Q Q N Y Q Q Y S Q N G N Q Q Q G N N R Y</b> |            |
| 11            | <b>Q N Y Q Q Y S Q N G N Q Q Q G N N R Y Q</b> |            |
| 12            | <b>N Y Q Q Y S Q N G N Q Q Q G N N R Y Q G</b> |            |
| 13            | <b>Y Q Q Y S Q N G N Q Q Q G N N R Y Q G Y</b> |            |
| 14            | Q Q Y S Q N G N Q Q Q G N N R Y Q G Y Q        |            |
| 15            | Q Y S Q N G N Q Q Q G N N R Y Q G Y Q A        |            |
| 16            | Y S Q N G N Q Q Q G N N R Y Q G Y Q A Y        |            |
| 17            | S Q N G N Q Q Q G N N R Y Q G Y Q A Y N        |            |
| 18            | Q N G N Q Q Q G N N R Y Q G Y Q A Y N A        |            |
| 19            | <b>N G N Q Q Q G N N R Y Q G Y Q A Y N A Q</b> |            |
| 20            | <b>G N Q Q Q G N N R Y Q G Y Q A Y N A Q A</b> |            |
| 21            | N Q Q Q G N N R Y Q G Y Q A Y N A Q A Q        |            |
| 22            | Q Q Q G N N R Y Q G Y Q A Y N A Q A Q P        |            |
| 23            | Q Q G N N R Y Q G Y Q A Y N A Q A Q P A        |            |
| 24            | Q G N N R Y Q G Y Q A Y N A Q A Q P A G        |            |
| 25            | G N N R Y Q G Y Q A Y N A Q A Q P A G G        |            |
| 26            | N N R Y Q G Y Q A Y N A Q A Q P A G G Y        |            |
| 27            | N R Y Q G Y Q A Y N A Q A Q P A G G Y Y        |            |
| 28            | R Y Q G Y Q A Y N A Q A Q P A G G Y Y Q        |            |
| 29            | Y Q G Y Q A Y N A Q A Q P A G G Y Y Q N        |            |
| 30            | Q G Y Q A Y N A Q A Q P A G G Y Y Q N Y        |            |
| 31            | G Y Q A Y N A Q A Q P A G G Y Y Q N Y Q        |            |
| 32            | Y Q A Y N A Q A Q P A G G Y Y Q N Y Q G        |            |
| 33            | Q A Y N A Q A Q P A G G Y Y Q N Y Q G Y        |            |
| 34            | A Y N A Q A Q P A G G Y Y Q N Y Q G Y S        |            |
| 35            | Y N A Q A Q P A G G Y Y Q N Y Q G Y S G        |            |
| 36            | N A Q A Q P A G G Y Y Q N Y Q G Y S G Y        |            |
| 37            | A Q A Q P A G G Y Y Q N Y Q G Y S G Y Q        |            |
| 38            | Q A Q P A G G Y Y Q N Y Q G Y S G Y Q Q        |            |
| 39            | A Q P A G G Y Y Q N Y Q G Y S G Y Q Q G        |            |
| 40            | Q P A G G Y Y Q N Y Q G Y S G Y Q Q G G        |            |
| 41            | P A G G Y Y Q N Y Q G Y S G Y Q Q G G Y        |            |
| 42            | A G G Y Y Q N Y Q G Y S G Y Q Q G G Y Q        |            |
| 43            | G G Y Y Q N Y Q G Y S G Y Q Q G G Y Q Q        |            |
| 44            | G Y Y Q N Y Q G Y S G Y Q Q G G Y Q Q Y        |            |
| 47            | Q N Y Q G Y S G Y Q Q G G Y Q Q Y N P D        |            |
| 50            | Q G Y S G Y Q Q G G Y Q Q Y N P D A G Y        |            |
| 53            | S G Y Q Q G G Y Q Q Y N P D A G Y Q Q Q        |            |

Supplementary Table S2 (continued)

| Start residue | N-terminus                              | C-terminus                                                                                      |
|---------------|-----------------------------------------|-------------------------------------------------------------------------------------------------|
| 56            | Q Q G G Y Q Q Y N P D A G Y Q Q Q Y N P | Q Q Q Y N P                                                                                     |
| 59            | G Y Q Q Y N P D A G Y Q Q Q Y N P Q G G | Q Q Q Y N P Q G G                                                                               |
| 62            | Q Y N P D A G Y Q Q Q Y N P Q G G Y Q Q | Q G G Y Q Q                                                                                     |
| 65            | P D A G Y Q Q Q Y N P Q G G Y Q Q Y N P | Q Q Q Y N P                                                                                     |
| 68            | G Y Q Q Q Y N P Q G G Y Q Q Y N P Q G G | Q G G Y Q Q                                                                                     |
| 71            | Q Q Y N P Q G G Y Q Q Y N P Q G G Y Q Q | Q G G Y Q Q                                                                                     |
| 72            | Q Y N P Q G G Y Q Q Y N P Q G G Y Q Q Q | Q G G Y Q Q Q                                                                                   |
| 73            | Y N P Q G G Y Q Q Y N P Q G G Y Q Q Q F | Q G G Y Q Q Q F                                                                                 |
| 74            | N P Q G G Y Q Q Y N P Q G G Y Q Q Q F N | Q G G Y Q Q Q F N                                                                               |
| 75            | P Q G G Y Q Q Y N P Q G G Y Q Q Q F N P | Q G G Y Q Q Q F N P                                                                             |
| 76            | Q G G Y Q Q Y N P Q G G Y Q Q Q F N P Q | Q G G Y Q Q Q F N P Q                                                                           |
| 77            | G G Y Q Q Y N P Q G G Y Q Q Q F N P Q G | Q G G Y Q Q Q F N P Q G                                                                         |
| 78            | G Y Q Q Y N P Q G G Y Q Q Q F N P Q G G | Q G G Y Q Q Q F N P Q G G                                                                       |
| 79            | Y Q Q Y N P Q G G Y Q Q Q F N P Q G G R | Q G G Y Q Q Q F N P Q G G R                                                                     |
| 80            | Q Q Y N P Q G G Y Q Q Q F N P Q G G R G | Q G G Y Q Q Q F N P Q G G R G                                                                   |
| 81            | Q Y N P Q G G Y Q Q Q F N P Q G G R G N | Q G G Y Q Q Q F N P Q G G R G N                                                                 |
| 82            | Y N P Q G G Y Q Q Q F N P Q G G R G N Y | Q G G Y Q Q Q F N P Q G G R G N Y                                                               |
| 83            | N P Q G G Y Q Q Q F N P Q G G R G N Y K | Q G G Y Q Q Q F N P Q G G R G N Y K                                                             |
| 84            | P Q G G Y Q Q Q F N P Q G G R G N Y K N | Q G G Y Q Q Q F N P Q G G R G N Y K N                                                           |
| 85            | Q G G Y Q Q Q F N P Q G G R G N Y K N F | Q G G Y Q Q Q F N P Q G G R G N Y K N F                                                         |
| 86            | G G Y Q Q Q F N P Q G G R G N Y K N F N | Q G G Y Q Q Q F N P Q G G R G N Y K N F N                                                       |
| 87            | G Y Q Q Q F N P Q G G R G N Y K N F N Y | Q G G Y Q Q Q F N P Q G G R G N Y K N F N Y                                                     |
| 88            | Y Q Q Q F N P Q G G R G N Y K N F N Y N | Q G G Y Q Q Q F N P Q G G R G N Y K N F N Y N                                                   |
| 89            | Q Q Q F N P Q G G R G N Y K N F N Y N N | Q G G Y Q Q Q F N P Q G G R G N Y K N F N Y N N                                                 |
| 90            | Q Q F N P Q G G R G N Y K N F N Y N N N | Q G G Y Q Q Q F N P Q G G R G N Y K N F N Y N N N                                               |
| 91            | Q F N P Q G G R G N Y K N F N Y N N N L | Q G G Y Q Q Q F N P Q G G R G N Y K N F N Y N N N L                                             |
| 92            | F N P Q G G R G N Y K N F N Y N N N L Q | Q G G Y Q Q Q F N P Q G G R G N Y K N F N Y N N N L Q                                           |
| 93            | N P Q G G R G N Y K N F N Y N N N L Q G | Q G G Y Q Q Q F N P Q G G R G N Y K N F N Y N N N L Q G                                         |
| 94            | P Q G G R G N Y K N F N Y N N N L Q G Y | Q G G Y Q Q Q F N P Q G G R G N Y K N F N Y N N N L Q G Y                                       |
| 95            | Q G G R G N Y K N F N Y N N N L Q G Y Q | Q G G Y Q Q Q F N P Q G G R G N Y K N F N Y N N N L Q G Y Q                                     |
| 96            | G G R G N Y K N F N Y N N N L Q G Y Q A | Q G G Y Q Q Q F N P Q G G R G N Y K N F N Y N N N L Q G Y Q A                                   |
| 97            | G R G N Y K N F N Y N N N L Q G Y Q A G | Q G G Y Q Q Q F N P Q G G R G N Y K N F N Y N N N L Q G Y Q A G                                 |
| 98            | R G N Y K N F N Y N N N L Q G Y Q A G F | Q G G Y Q Q Q F N P Q G G R G N Y K N F N Y N N N L Q G Y Q A G F                               |
| 99            | G N Y K N F N Y N N N L Q G Y Q A G F Q | Q G G Y Q Q Q F N P Q G G R G N Y K N F N Y N N N L Q G Y Q A G F Q                             |
| 100           | N Y K N F N Y N N N L Q G Y Q A G F Q P | Q G G Y Q Q Q F N P Q G G R G N Y K N F N Y N N N L Q G Y Q A G F Q P                           |
| 101           | Y K N F N Y N N N L Q G Y Q A G F Q P Q | Q G G Y Q Q Q F N P Q G G R G N Y K N F N Y N N N L Q G Y Q A G F Q P Q                         |
| 102           | K N F N Y N N N L Q G Y Q A G F Q P Q S | Q G G Y Q Q Q F N P Q G G R G N Y K N F N Y N N N L Q G Y Q A G F Q P Q S                       |
| 103           | N F N Y N N N L Q G Y Q A G F Q P Q S Q | Q G G Y Q Q Q F N P Q G G R G N Y K N F N Y N N N L Q G Y Q A G F Q P Q S Q                     |
| 104           | F N Y N N N L Q G Y Q A G F Q P Q S Q G | Q G G Y Q Q Q F N P Q G G R G N Y K N F N Y N N N L Q G Y Q A G F Q P Q S Q G                   |
| 105           | N Y N N N L Q G Y Q A G F Q P Q S Q G M | Q G G Y Q Q Q F N P Q G G R G N Y K N F N Y N N N L Q G Y Q A G F Q P Q S Q G M                 |
| 106           | Y N N N L Q G Y Q A G F Q P Q S Q G M S | Q G G Y Q Q Q F N P Q G G R G N Y K N F N Y N N N L Q G Y Q A G F Q P Q S Q G M S               |
| 107           | N N N L Q G Y Q A G F Q P Q S Q G M S L | Q G G Y Q Q Q F N P Q G G R G N Y K N F N Y N N N L Q G Y Q A G F Q P Q S Q G M S L             |
| 108           | N N L Q G Y Q A G F Q P Q S Q G M S L N | Q G G Y Q Q Q F N P Q G G R G N Y K N F N Y N N N L Q G Y Q A G F Q P Q S Q G M S L N           |
| 109           | N L Q G Y Q A G F Q P Q S Q G M S L N D | Q G G Y Q Q Q F N P Q G G R G N Y K N F N Y N N N L Q G Y Q A G F Q P Q S Q G M S L N D         |
| 110           | L Q G Y Q A G F Q P Q S Q G M S L N D F | Q G G Y Q Q Q F N P Q G G R G N Y K N F N Y N N N L Q G Y Q A G F Q P Q S Q G M S L N D F       |
| 113           | Y Q A G F Q P Q S Q G M S L N D F Q K Q | Q G G Y Q Q Q F N P Q G G R G N Y K N F N Y N N N L Q G Y Q A G F Q P Q S Q G M S L N D F Q K Q |

Supplementary Table S2 (continued)

| Start residue | N-terminus                              | C-terminus |
|---------------|-----------------------------------------|------------|
| 116           | G F Q P Q S Q G M S L N D F Q K Q Q K Q |            |
| 119           | P Q S Q G M S L N D F Q K Q Q K Q A A P |            |
| 122           | Q G M S L N D F Q K Q Q K Q A A P K P K |            |
| 125           | S L N D F Q K Q Q K Q A A P K P K K T L |            |
| 128           | D F Q K Q Q K Q A A P K P K K T L K L V |            |
| 131           | K Q Q K Q A A P K P K K T L K L V S S S |            |
| 134           | K Q A A P K P K K T L K L V S S S G I K |            |
| 137           | A P K P K K T L K L V S S S G I K L A N |            |
| 140           | P K K T L K L V S S S G I K L A N A T K |            |
| 143           | T L K L V S S S G I K L A N A T K K V G |            |
| 146           | L V S S S G I K L A N A T K K V G T K P |            |
| 149           | S S G I K L A N A T K K V G T K P A E S |            |
| 152           | I K L A N A T K K V G T K P A E S D K K |            |
| 155           | A N A T K K V G T K P A E S D K K E E E |            |
| 158           | T K K V G T K P A E S D K K E E E K S A |            |
| 161           | V G T K P A E S D K K E E E K S A E T K |            |
| 164           | K P A E S D K K E E E K S A E T K E P T |            |
| 167           | E S D K K E E E K S A E T K E P T K E P |            |
| 170           | K K E E E K S A E T K E P T K E P T K V |            |
| 173           | E E K S A E T K E P T K E P T K V E E P |            |
| 176           | S A E T K E P T K E P T K V E E P V K K |            |
| 179           | T K E P T K E P T K V E E P V K K E E K |            |
| 182           | P T K E P T K V E E P V K K E E K P V Q |            |
| 185           | E P T K V E E P V K K E E K P V Q T E E |            |
| 188           | K V E E P V K K E E K P V Q T E E K T E |            |
| 191           | E P V K K E E K P V Q T E E K T E E K S |            |
| 194           | K K E E K P V Q T E E K T E E K S E L P |            |
| 197           | E K P V Q T E E K T E E K S E L P K V E |            |
| 200           | V Q T E E K T E E K S E L P K V E D L K |            |
| 206           | T E E K S E L P K V E D L K I S E S T H |            |
| 212           | L P K V E D L K I S E S T H N T N N A N |            |
| 218           | L K I S E S T H N T N N A N V T S A D A |            |
| 224           | T H N T N N A N V T S A D A L I K E Q E |            |
| 230           | A N V T S A D A L I K E Q E E E V D D E |            |
| 236           | D A L I K E Q E E E V D D E V V N D M F |            |
| 242           | Q E E E V D D E V V N D M F G G K D H V |            |
| 248           | D E V V N D M F G G K D H V S L I F M G |            |
| 254           | M F G G K D H V S L I F M G H V D A G K |            |

**Supplementary Table S3.** CaNM 20mer peptides that were tested in this work. Peptides that bound full-length CaNM after 2 hours (1  $\mu$ M CaNM, 5% label) and 2.5 days (5  $\mu$ M CaNM, 75% label) of incubation are highlighted in bold and regular red text, respectively.

| Start residue | N-terminus                                       | C-terminus |
|---------------|--------------------------------------------------|------------|
| 2             | S D Q Q N T Q D Q L S G A M A N A S L N          |            |
| 5             | Q N T Q D Q L S G A M A N A S L N G D Q          |            |
| 8             | Q D Q L S G A M A N A S L N G D Q S K Q          |            |
| 11            | L S G A M A N A S L N G D Q S K Q Q Q Q          |            |
| 14            | A M A N A S L N G D Q S K Q Q Q Q Q Q            |            |
| 17            | N A S L N G D Q S K Q Q Q Q Q Q Q Q              |            |
| 20            | L N G D Q S K Q Q Q Q Q Q Q Q Q Q N Y            |            |
| 23            | D Q S K Q Q Q Q Q Q Q Q Q Q N Y Y N P            |            |
| 26            | K Q Q Q Q Q Q Q Q Q Q Q N Y Y N P N A A          |            |
| 29            | Q Q Q Q Q Q Q Q Q N Y Y N P N A A Q S F          |            |
| 32            | Q Q Q Q Q Q N Y Y N P N A A Q S F V P Q          |            |
| 35            | Q Q Q N Y Y N P N A A Q S F V P Q G G Y          |            |
| 38            | N Y Y N P N A A Q S F V P Q G G Y Q Q F          |            |
| 41            | N P N A A Q S F V P Q G G Y Q Q F Q Q F          |            |
| 44            | A A Q S F V P Q G G Y Q Q F Q Q F Q P Q          |            |
| 45            | A Q S F V P Q G G Y Q Q F Q Q F Q P Q Q          |            |
| 46            | Q S F V P Q G G Y Q Q F Q Q F Q P Q Q Q          |            |
| 47            | <b>S F V P Q G G Y Q Q F Q Q F Q P Q Q Q Q</b>   |            |
| 48            | F V P Q G G Y Q Q F Q Q F Q P Q Q Q Q Q          |            |
| 49            | V P Q G G Y Q Q F Q Q F Q P Q Q Q Q Q Q          |            |
| 50            | P Q G G Y Q Q F Q Q F Q P Q Q Q Q Q Q Y          |            |
| 51            | Q G G Y Q Q F Q Q F Q P Q Q Q Q Q Q Y G          |            |
| 52            | G G Y Q Q F Q Q F Q P Q Q Q Q Q Q Y G G          |            |
| 53            | G Y Q Q F Q Q F Q P Q Q Q Q Q Q Y G G Y          |            |
| 54            | Y Q Q F Q Q F Q P Q Q Q Q Q Q Y G G Y N          |            |
| 55            | Q Q F Q Q F Q P Q Q Q Q Q Q Y G G Y N Q          |            |
| 56            | <b>Q F Q Q F Q P Q Q Q Q Q Q Y G G Y N Q Y</b>   |            |
| 57            | <b>F Q Q F Q P Q Q Q Q Q Q Q Y G G Y N Q Y N</b> |            |
| 58            | <b>Q Q F Q P Q Q Q Q Q Q Y G G Y N Q Y N Q</b>   |            |
| 59            | <b>Q F Q P Q Q Q Q Q Q Y G G Y N Q Y N Q Y</b>   |            |
| 60            | <b>F Q P Q Q Q Q Q Q Y G G Y N Q Y N Q Y Q</b>   |            |
| 61            | <b>Q P Q Q Q Q Q Q Y G G Y N Q Y N Q Y Q G</b>   |            |
| 62            | <b>P Q Q Q Q Q Q Y G G Y N Q Y N Q Y Q G G</b>   |            |
| 63            | <b>Q Q Q Q Q Q Y G G Y N Q Y N Q Y Q G G Y</b>   |            |
| 64            | Q Q Q Q Q Y G G Y N Q Y N Q Y Q G G Y Q          |            |
| 65            | Q Q Q Q Y G G Y N Q Y N Q Y Q G G Y Q Q          |            |
| 66            | <b>Q Q Q Y G G Y N Q Y N Q Y Q G G Y Q Q N</b>   |            |
| 67            | <b>Q Q Y G G Y N Q Y N Q Y Q G G Y Q Q N Y</b>   |            |
| 68            | Q Y G G Y N Q Y N Q Y Q G G Y Q Q N Y N          |            |
| 69            | Y G G Y N Q Y N Q Y Q G G Y Q Q N Y N N          |            |
| 70            | <b>G G Y N Q Y N Q Y Q G G Y Q Q N Y N N R</b>   |            |
| 71            | <b>G Y N Q Y N Q Y Q G G Y Q Q N Y N N R G</b>   |            |
| 72            | <b>Y N Q Y N Q Y Q G G Y Q Q N Y N N R G G</b>   |            |
| 73            | N Q Y N Q Y Q G G Y Q Q N Y N N R G G Y          |            |
| 74            | Q Y N Q Y Q G G Y Q Q N Y N N R G G Y Q          |            |
| 75            | Y N Q Y Q G G Y Q Q N Y N N R G G Y Q Q          |            |



Supplementary Table S3 (continued)

| Start residue | N-terminus                              | C-terminus |
|---------------|-----------------------------------------|------------|
| 122           | G G Y Q Q Y N S Q P Q Q Q Q Q Q Q S Q G |            |
| 123           | G Y Q Q Y N S Q P Q Q Q Q Q Q Q S Q G M |            |
| 124           | Y Q Q Y N S Q P Q Q Q Q Q Q Q S Q G M S |            |
| 125           | Q Q Y N S Q P Q Q Q Q Q Q Q S Q G M S L |            |
| 128           | N S Q P Q Q Q Q Q Q Q S Q G M S L A D F |            |
| 131           | P Q Q Q Q Q Q Q S Q G M S L A D F Q K Q |            |
| 134           | Q Q Q Q Q S Q G M S L A D F Q K Q K T E |            |
| 137           | Q Q S Q G M S L A D F Q K Q K T E Q Q A |            |
| 140           | Q G M S L A D F Q K Q K T E Q Q A S L N |            |
| 143           | S L A D F Q K Q K T E Q Q A S L N K P A |            |
| 146           | D F Q K Q K T E Q Q A S L N K P A V K K |            |
| 149           | K Q K T E Q Q A S L N K P A V K K T L K |            |
| 152           | T E Q Q A S L N K P A V K K T L K L A G |            |
| 155           | Q A S L N K P A V K K T L K L A G S S G |            |
| 158           | L N K P A V K K T L K L A G S S G I K L |            |
| 161           | P A V K K T L K L A G S S G I K L A N A |            |
| 164           | K K T L K L A G S S G I K L A N A T K K |            |
| 167           | L K L A G S S G I K L A N A T K K V D T |            |
| 170           | A G S S G I K L A N A T K K V D T T S K |            |
| 173           | S G I K L A N A T K K V D T T S K P Q S |            |
| 176           | K L A N A T K K V D T T S K P Q S K E S |            |
| 179           | N A T K K V D T T S K P Q S K E S S P A |            |
| 182           | K K V D T T S K P Q S K E S S P A P A P |            |
| 185           | D T T S K P Q S K E S S P A P A P A P A |            |
| 188           | S K P Q S K E S S P A P A P A P A A F A |            |
| 191           | Q S K E S S P A P A P A P A A F A S Q E |            |
| 194           | E S S P A P A P A P A A F A S Q E E K K |            |
| 197           | P A P A P A P A A F A S Q E E K K E E K |            |
| 200           | A P A P A A F A S Q E E K K E E K E A A |            |
| 206           | F A S Q E E K K E E K E A A A A T P E T |            |
| 212           | K K E E K E A A A A T P E T K K E T S A |            |
| 218           | A A A A T P E T K K E T S A P A E T K K |            |
| 224           | E T K K E T S A P A E T K K E A T P T P |            |
| 230           | S A P A E T K K E A T P T P A A K K E S |            |
| 236           | K K E A T P T P A A K K E S T P T P A T |            |
| 242           | T P A A K K E S T P T P A T A T K K E S |            |
| 248           | E S T P T P A T A T K K E S T P V S N S |            |
| 254           | A T A T K K E S T P V S N S A S V A T A |            |
